# Supplementary material for: Synthesis of copolyesters based on substituted and non-substituted lactones towards the control of their crystallinity and their potential effect on hydrolytic degradation in the design of soft medical devices
Source: Royal Society of Chemistry journal article supplement (doi:10.1039/d2ra01861f), 2022-01-01
Supplement: d2ra01861f1.pdf [file d2ra01861f1.pdf]

## Synthesis of copolyesters based on substituted and non-substituted lactones. Towards the control of their crystallinity and their potential effect on hydrolytic degradation in design of soft medical devices

Gabriela Ramos-Durán, Aracely del Carmen González-Zarate, Francisco Javier Enríquez-Medrano, Myrna Salinas-Hernández, Marco A. De Jesús-Téllez\*, Ramón Díaz de León\*, Héctor Ricardo López-González\*

Centro de Investigación en Química Aplicada, Blvd. Enrique Reyna Herosillo # 140, San José de los Cerritos, 25294, Saltillo Coahuila México, e-mail: ricardo.lopez@ciqa.edu.mx

### Supporting Information

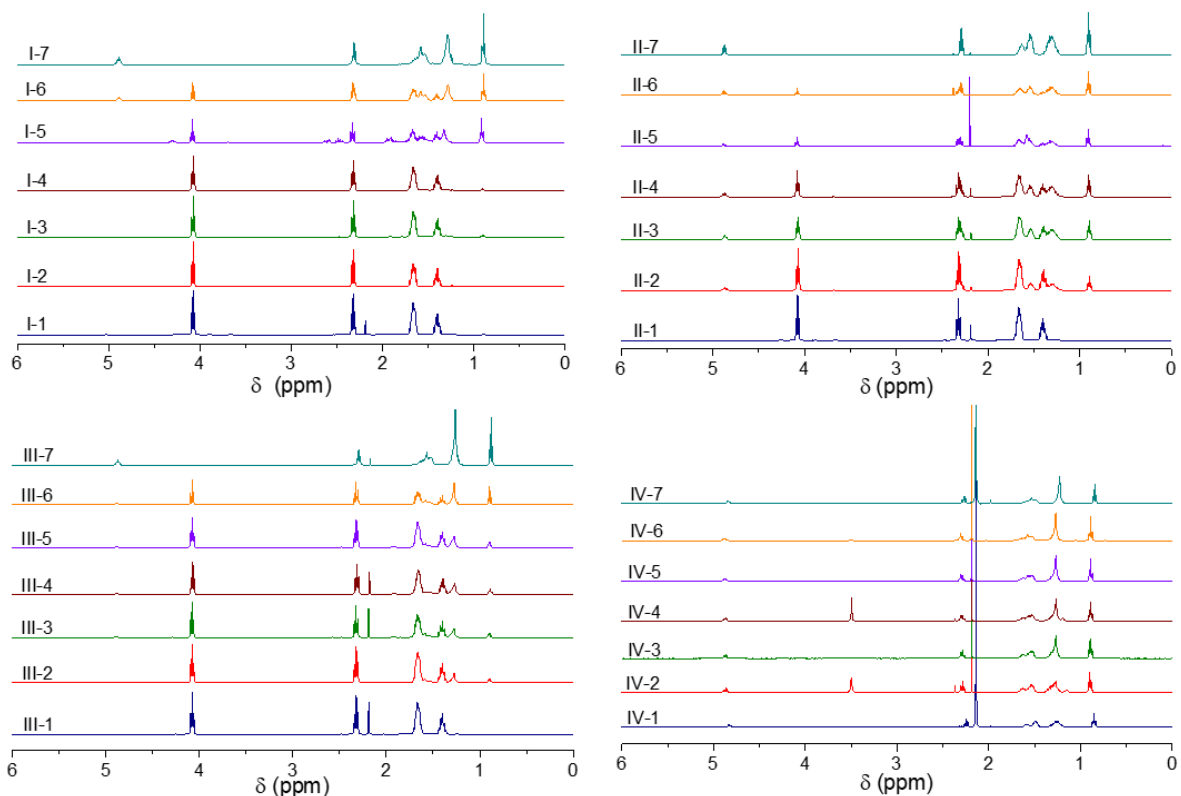

Figure S1. <sup>1</sup>H NMR spectra in copolymer series I-IV.

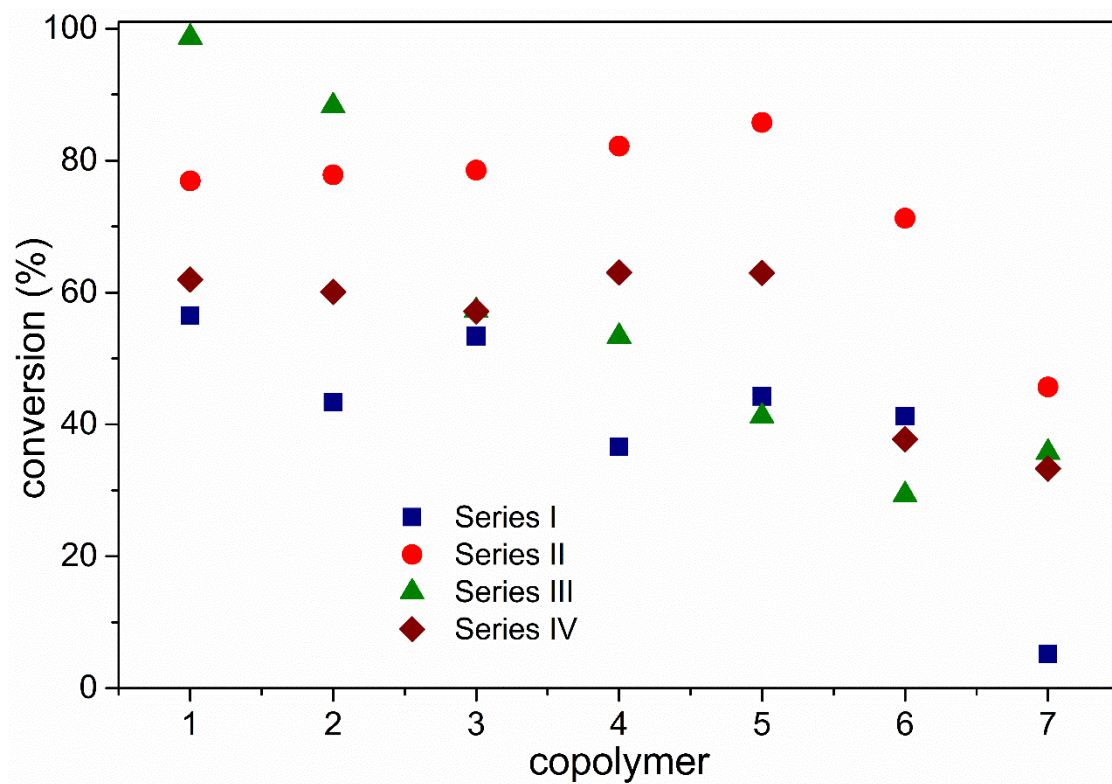

Figure S2. Determination of global conversion in copolymer series I-IV.
